# Supplementary material for: Supramolecular squares of Sn(iv)porphyrins with Re(i)-corners for the fabrication of self-assembled nanostructures performing photocatalytic degradation of Eriochrome Black T dye
Source: Royal Society of Chemistry journal article supplement (doi:10.1039/d2qi02194c), 2022-11-16
Supplement: d2qi02194c1.pdf [file d2qi02194c1.pdf]

## Electronic Supplementary Information

# Supramolecular squares of Sn(IV)porphyrins with Re(I)-corners for the fabrication of self-assembled nanostructures performing photocatalytic degradation of Eriochrome Black T dye

Nirmal Kumar Shee and Hee-Joon Kim\*

*Department of Chemistry and Bioscience, Kumoh National Institute of Technology*

*61 Daehak-ro, Gumi 39177, Republic of Korea*

## List of contents:

**Fig. S1**  $^1\text{H-NMR}$  spectrum of *trans*-[5,15-bis(4-pyridyl)-10,20-bis(4-*tert*-butylphenyl)porphyrin]  $\text{H}_2\text{P}^2$  in  $\text{CDCl}_3$ .

**Fig. S2**  $^1\text{H-NMR}$  spectrum of *trans*-[5,15-bis(4-pyridyl)-10,20-bis(4-*tert*-butylphenyl)porphyrinato]tin(IV)  $\text{SnP}^2$  in  $\text{CDCl}_3$ .

**Fig. S3**  $^1\text{H-NMR}$  spectrum of **1** in  $\text{CDCl}_3$ .

**Fig. S4**  $^1\text{H-NMR}$  spectrum of **2** in  $\text{CDCl}_3$ .

**Fig. S5** Electrospray ionization mass (ESI-MS) spectrum of  $\text{SnP}^2$ .

**Fig. S6** ESI-MS spectrum of **1**.

**Fig. S7** ESI-MS spectrum of **2**.

**Fig. S8** Thermogravimetric analysis (TGA) curves of **1** and **2**.

**Fig. S9** Powder X-ray diffraction (PXRD) patterns of **1** and **2**.

**Fig. S10** Particle size determination by dynamic light scattering (DLS) for **1** and **2** in toluene.

**Fig. S11** Field emission scanning electron microscopy (FE-SEM) images for  $\text{SnP}^1$  (a) and  $\text{SnP}^2$  (b).

**Fig. S12** Adsorption and desorption isotherms of  $\text{N}_2$  for **1** and **2** at 77 K.

**Fig. S13** Adsorption of Eriochrome Black T (EBT) dye on **1** and **2**.

**Fig. S14** Time-dependent absorption spectra of EBT dye in the presence of **2** under visible-light irradiation.

**Fig. S15** Kinetics of the photocatalytic degradation of EBT dye under visible-light irradiation by photocatalysts **1** and **2**.

**Fig. S16** Typical catalytic cycle (up to 10 consecutive cycles) of photocatalyst **2** for the degradation of EBT dye.

**Table S1**. Pseudo-first-order degradation rate constant of EBT dye for each cycle.

**Fig. S17** Typical FE-SEM images of photocatalysts **1** (a) and **2** (b) after the degradation of EBT dye (10 consecutive cycles).

**Fig. S18** Effect of temperature on the degradation of EBT dye by **2**.

**Fig. S19** Effect of pH of the EBT dye solution on the photodegradation by **2**.

**Fig. S20** Effect of EBT dye concentration on the photodegradation by **2** (20 mg) within 90 min of visible-light irradiation.

**Fig. S21** Effect of various scavengers on the degradation of EBT dye in the presence of **2** under visible-light irradiation ( $[\text{Na}_2\text{-EDTA}]_0 = [\textit{p}\text{-BQ}]_0 = [\textit{t}\text{BuOH}]_0 = 5\text{mM}$ , pH 7.0,  $T = 298\text{ K}$ ).  $\text{SnP}^1$  and  $\text{SnP}^2$  were used as catalysts for comparison.

**Fig. S22** Photocatalytic activities of **2** at different wavelengths for the degradation of EBT dye.

**Fig. S23** Negative ion mode ESI-MS spectrum of the reaction mixture of EBT dye in the presence of **2** after 45 min of visible-light irradiation.

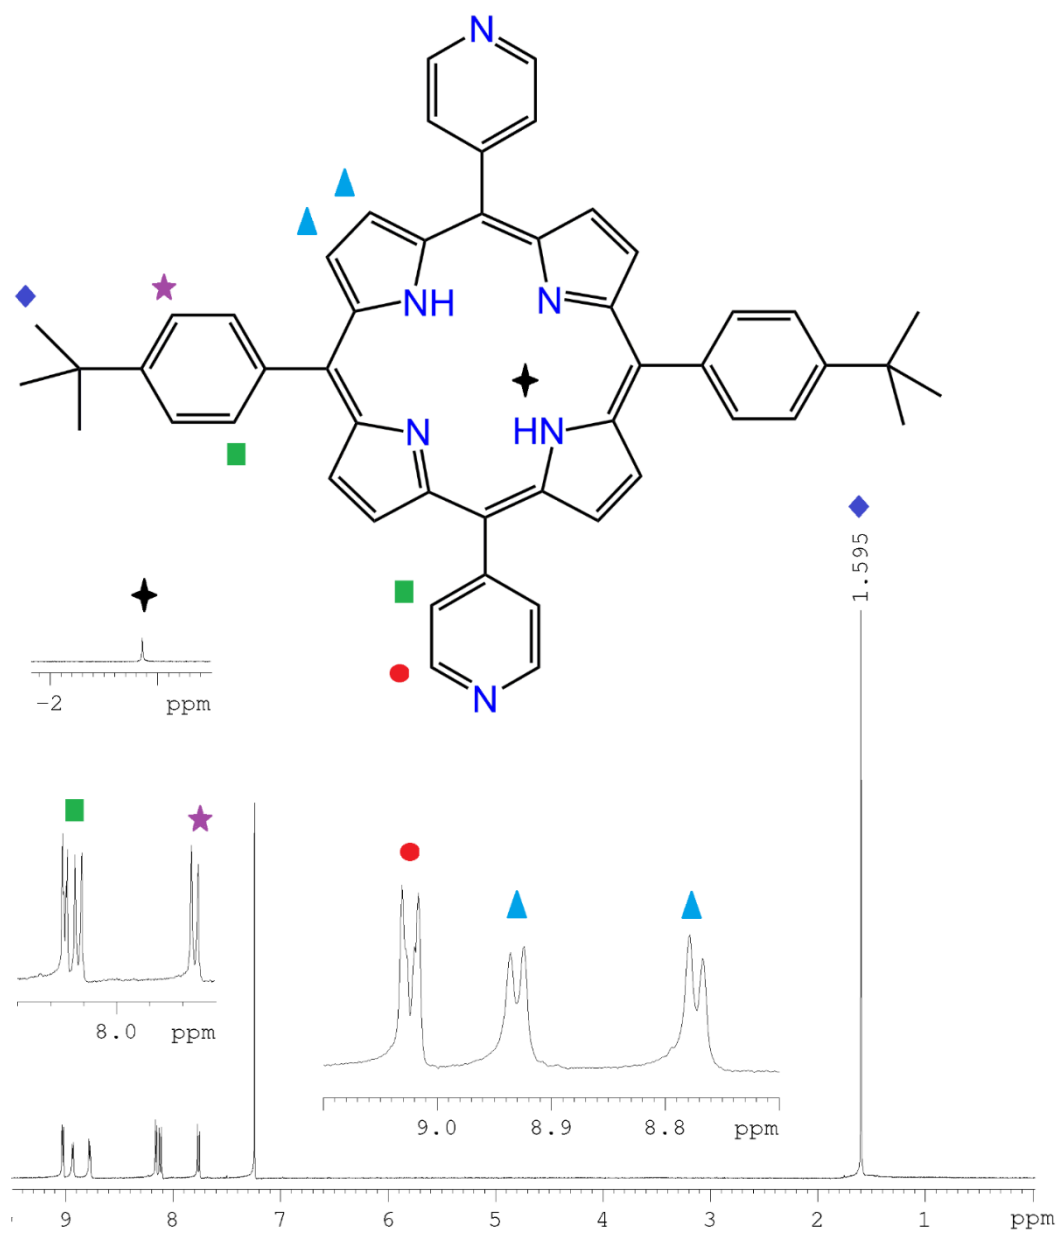

**Fig. S1**  $^1H$ -NMR spectrum of *trans*-[5,15-bis(4-pyridyl)-10,20-bis(4-*tert*-butylphenyl)porphyrin]  $H_2P^2$  in  $CDCl_3$ .

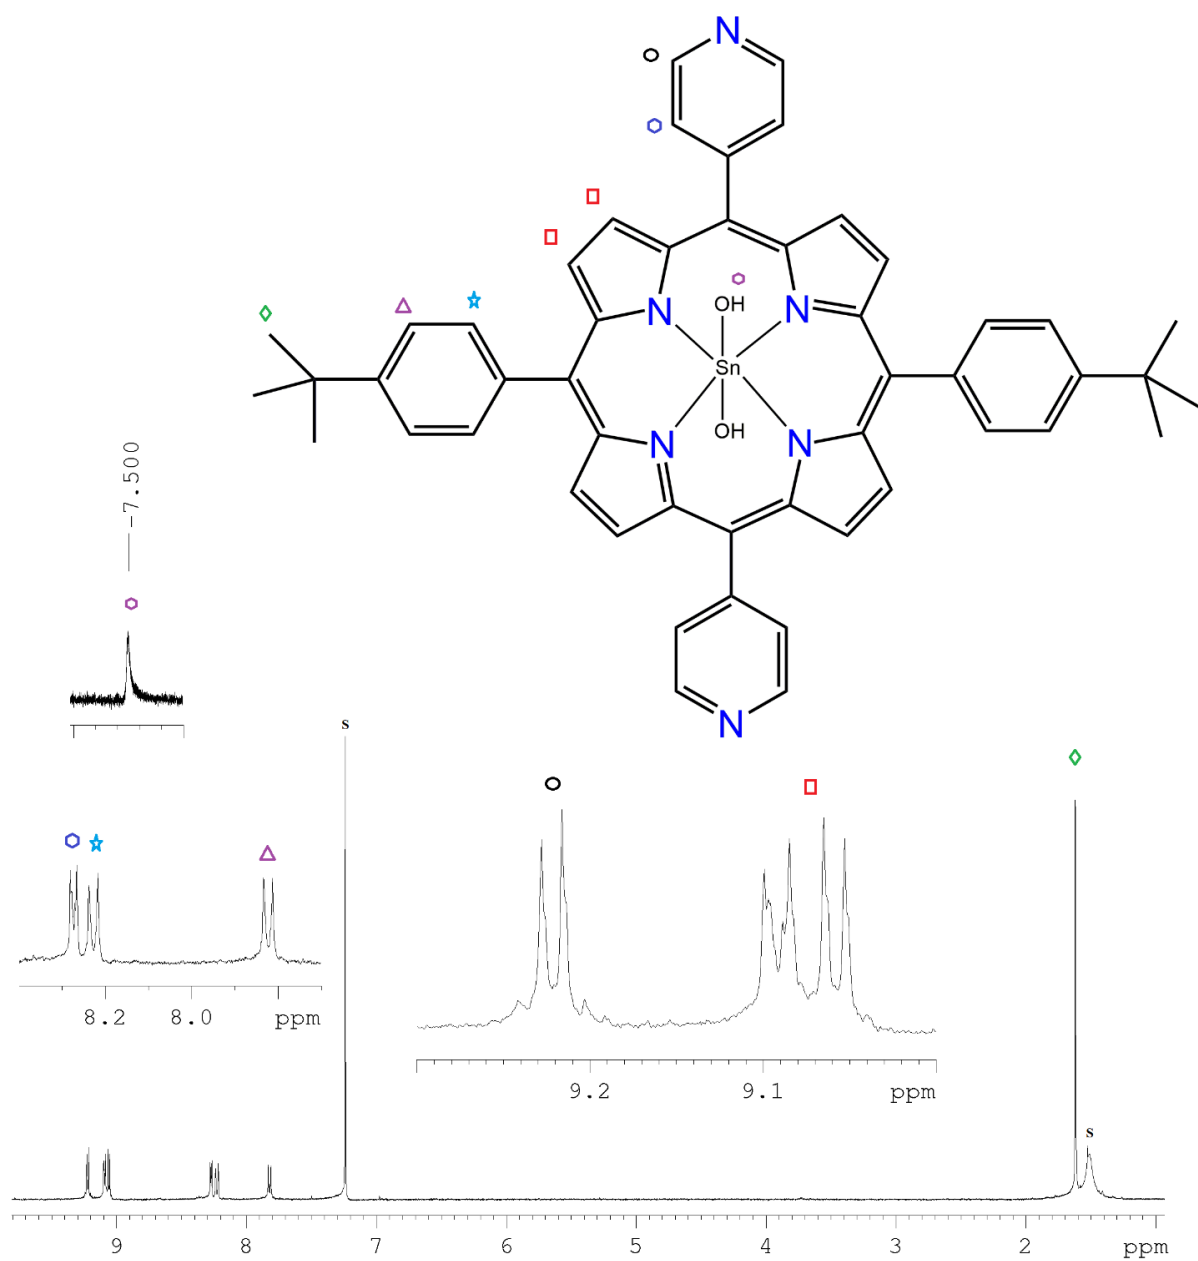

**Fig. S2** <sup>1</sup>H-NMR spectrum of *trans*-[5,15-bis(4-pyridyl)-10,20-bis(4-*tert*-butylphenyl)porphyrinato]tin(IV) **SnP<sup>2</sup>** in CDCl<sub>3</sub>.

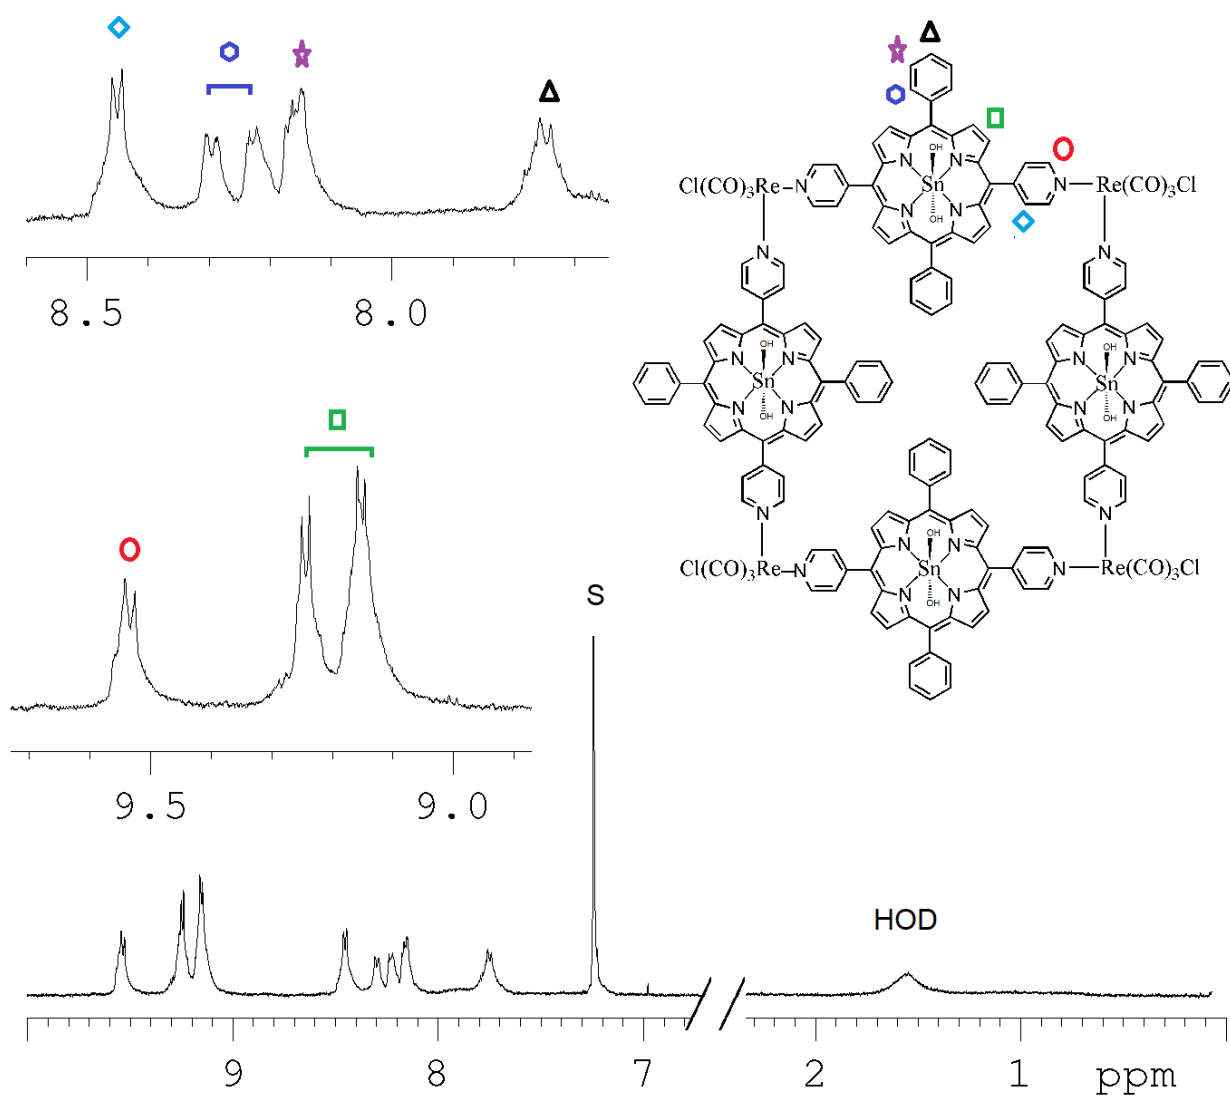

Fig. S3  $^1\text{H-NMR}$  spectrum of **1** in  $\text{CDCl}_3$ .

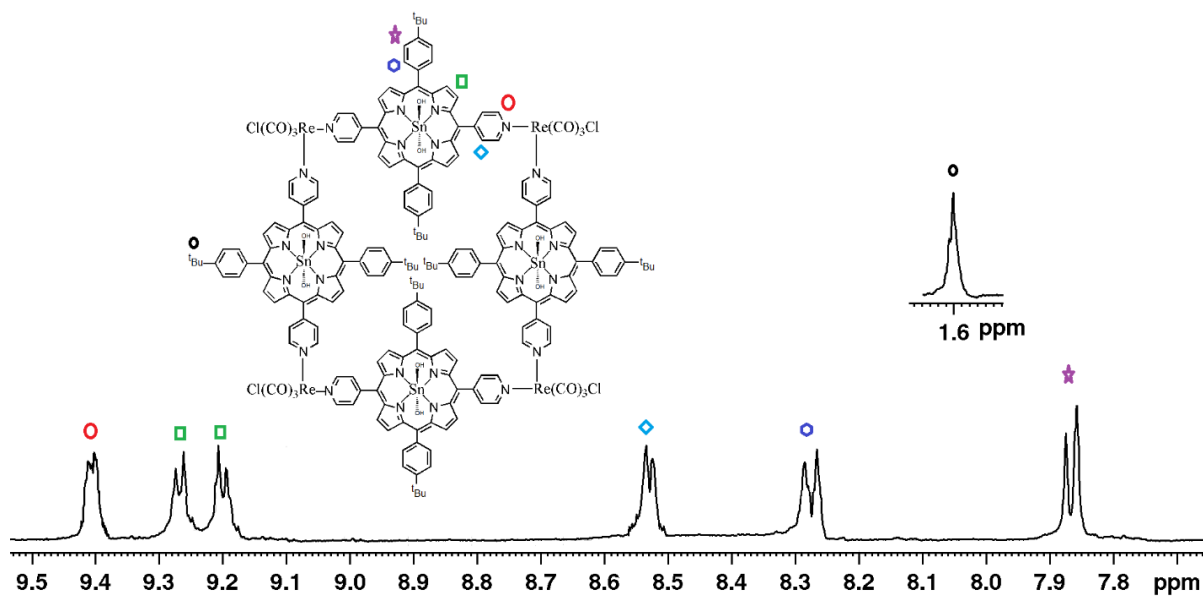

Fig. S4  $^1\text{H-NMR}$  spectrum of **2** in  $\text{CDCl}_3$ .

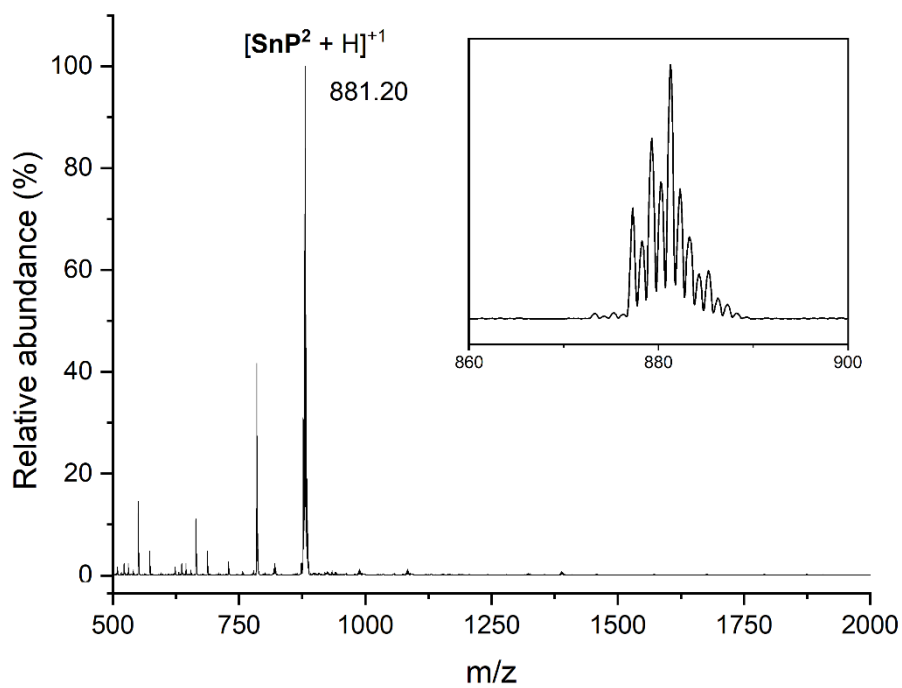

Fig. S5 Electrospray ionization mass (ESI-MS) spectrum of  $\text{SnP}^2$ .

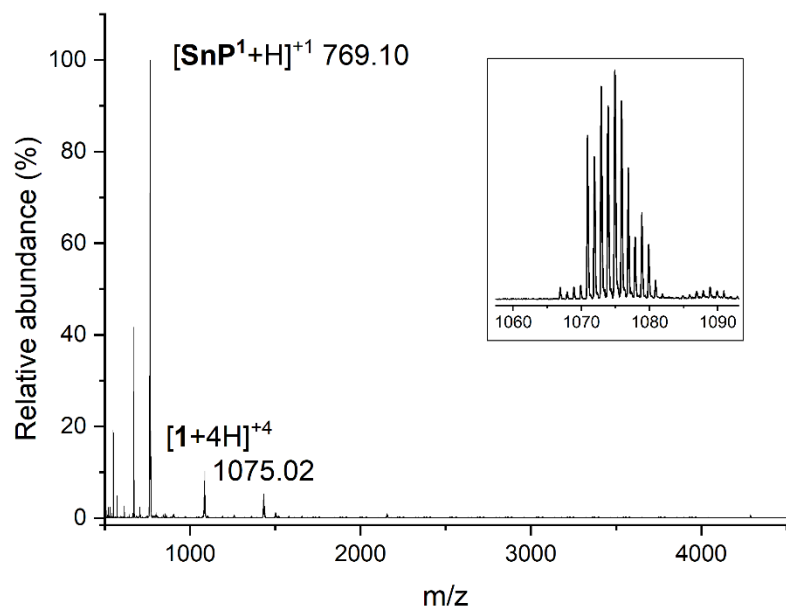

Fig. S6 ESI-MS spectrum of **1**.

---

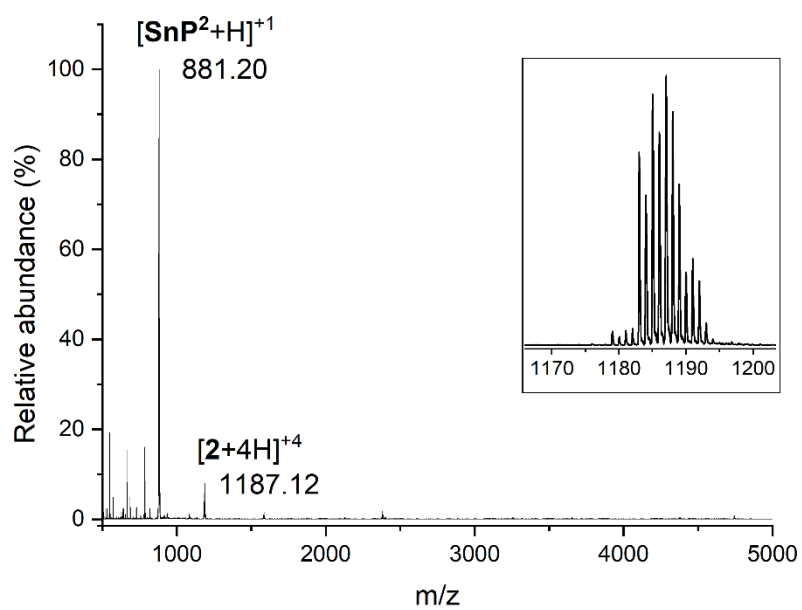

Fig. S7 ESI-MS spectrum of **2**.

---

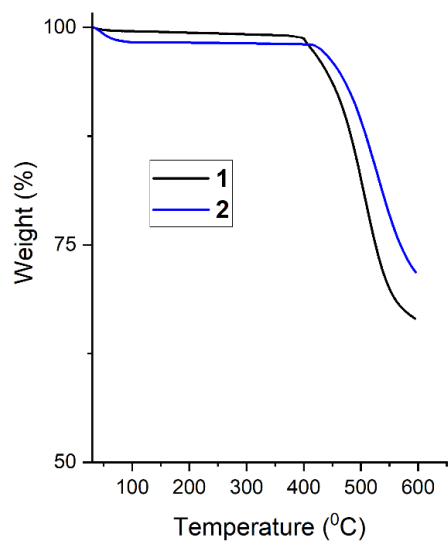

Fig. S8 Thermogravimetric analysis (TGA) curves of **1** and **2**.

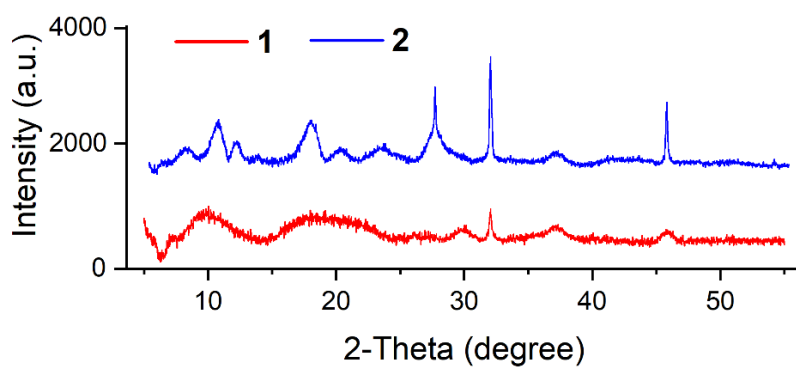

Fig. S9 Powder X-ray diffraction (PXRD) patterns of **1** and **2**.

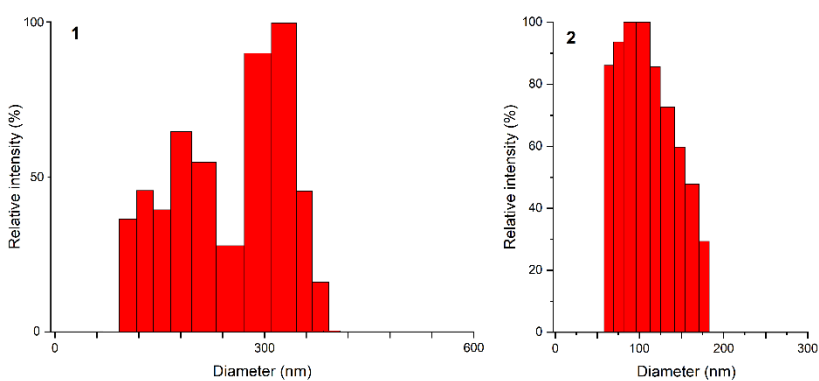

Fig. S10 Particle size determination by dynamic light scattering (DLS) for **1** and **2** in toluene.



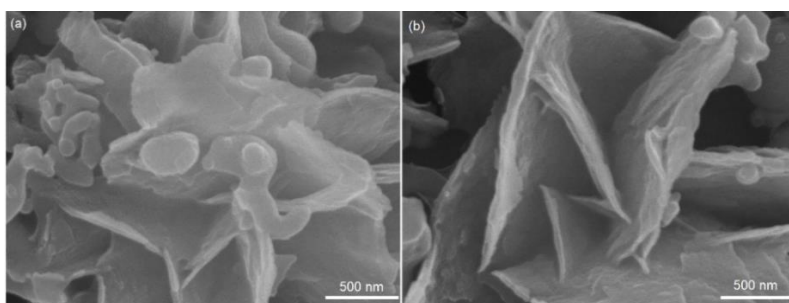

**Fig. S11** Field emission scanning electron microscopy (FE-SEM) images for **SnP<sup>1</sup>** (a) and **SnP<sup>2</sup>** (b).

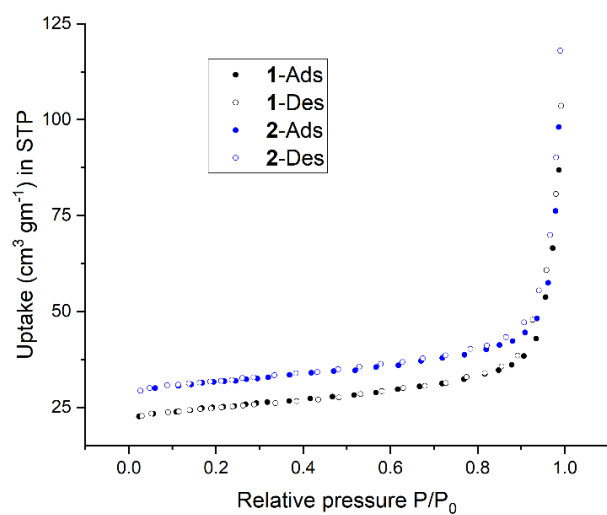

**Fig. S12** Adsorption and desorption isotherms of  $N_2$  for **1** and **2** at 77 K.

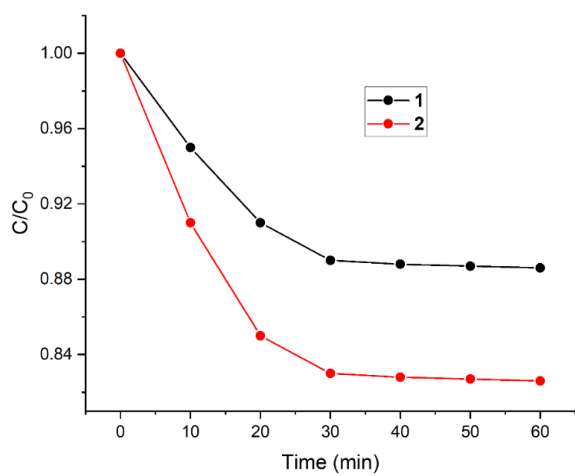

**Fig. S13** Adsorption of Eriochrome Black T (EBT) dye on **1** and **2**.

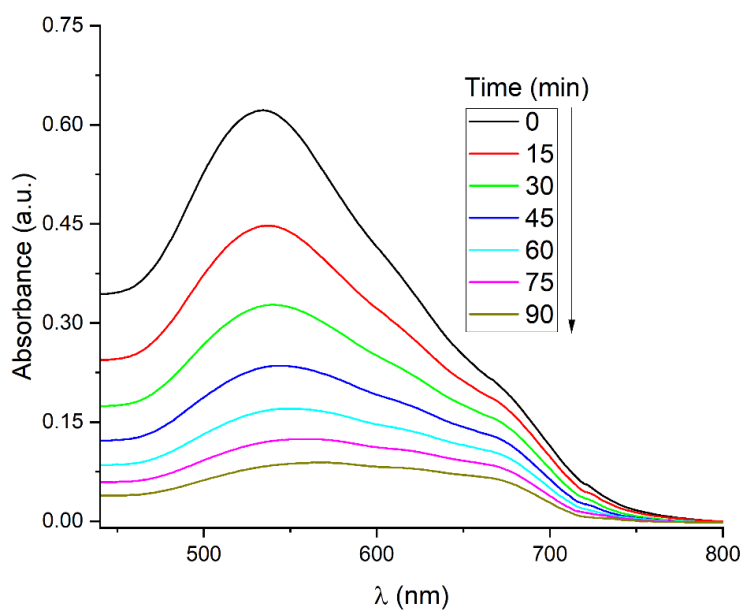

**Fig. S14** Time-dependent absorption spectra of EBT dye in the presence of **2** under visible-light irradiation.

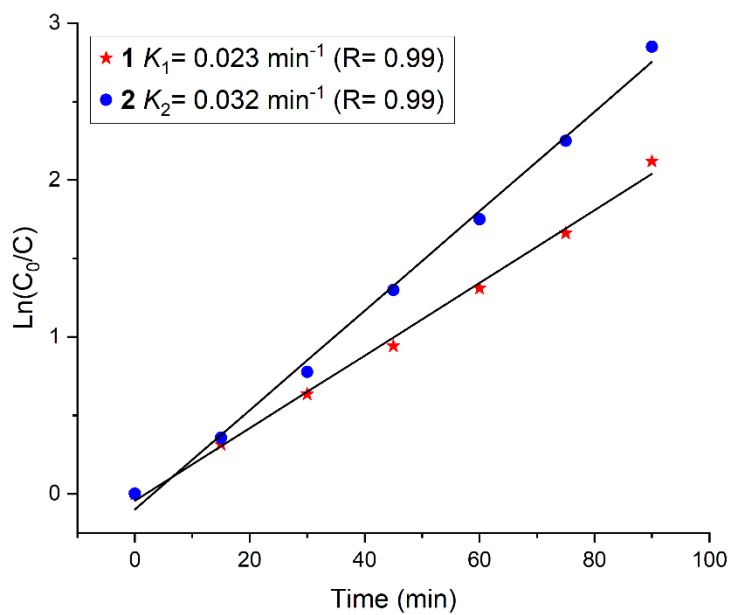

**Fig. S15** Kinetics of the photocatalytic degradation of EBT dye under visible-light irradiation by photocatalysts **1** and **2**.

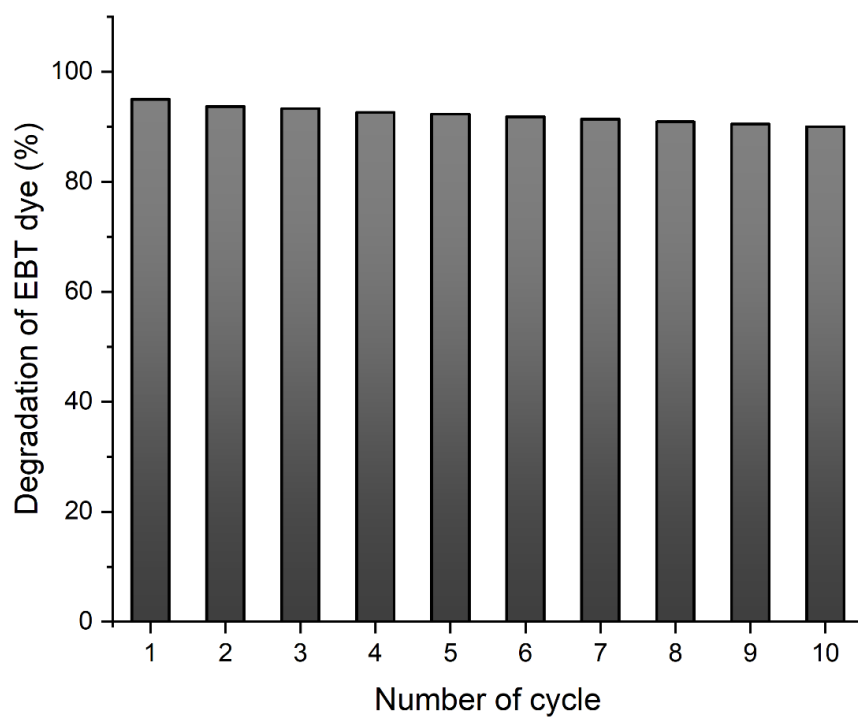

**Fig. S16** Typical catalytic cycle (up to consecutive 10 cycles) of photocatalyst **2** for the degradation of EBT dye.

---

**Table S1.** Pseudo-first-order degradation rate constant of EBT dye for each cycle.

| Number of cycle | Rate constant $k$ ( $\text{min}^{-1}$ ) |
|-----------------|-----------------------------------------|
| 1               | 0.0320                                  |
| 2               | 0.0317                                  |
| 3               | 0.0313                                  |
| 4               | 0.0309                                  |
| 5               | 0.0305                                  |
| 6               | 0.0301                                  |
| 7               | 0.0298                                  |
| 8               | 0.0295                                  |
| 9               | 0.0292                                  |
| 10              | 0.0290                                  |

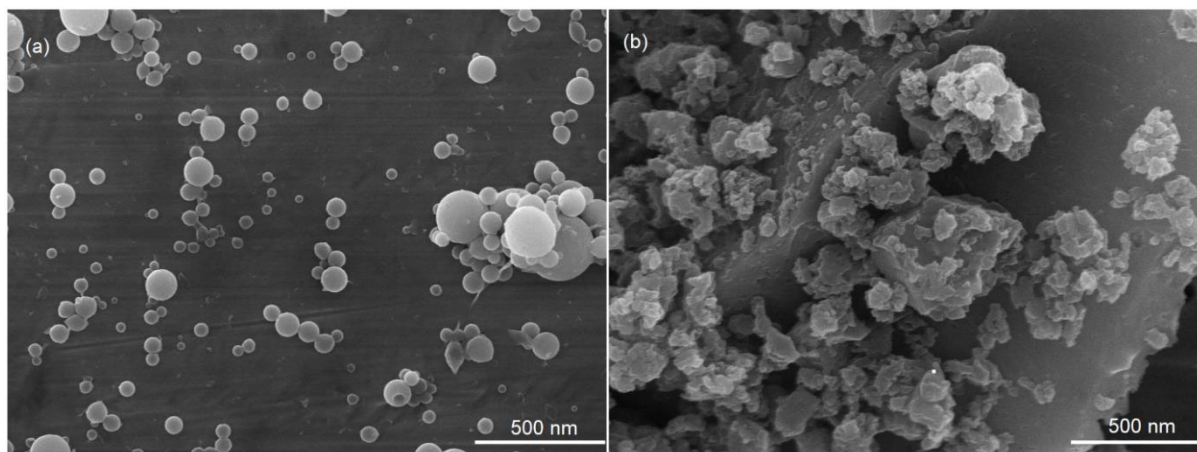

**Fig. S17** Typical FE-SEM images of photocatalysts **1** (a), and **2** (b) after the degradation of EBT dye (consecutive 10 cycles).

---

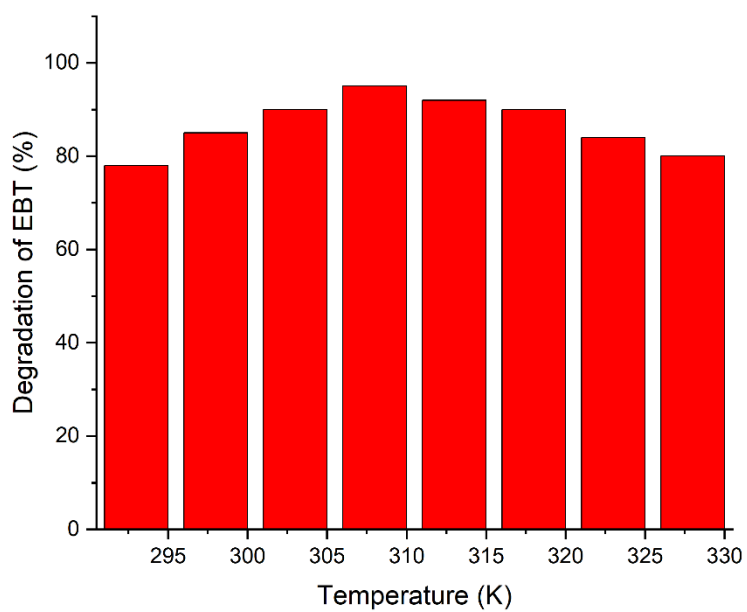

**Fig. S18** Effect of temperature on the degradation of EBT dye by **2**.

---

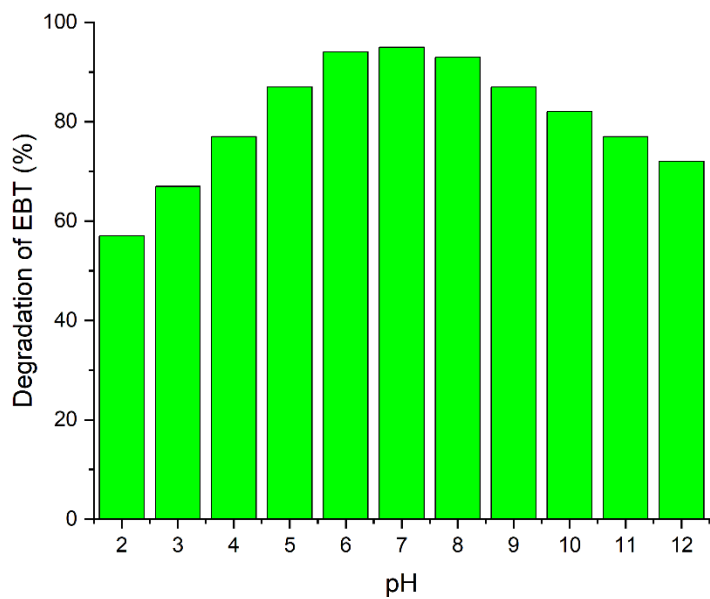

**Fig. S19** Effect of pH of the EBT dye solution on the photodegradation by **2**.

---

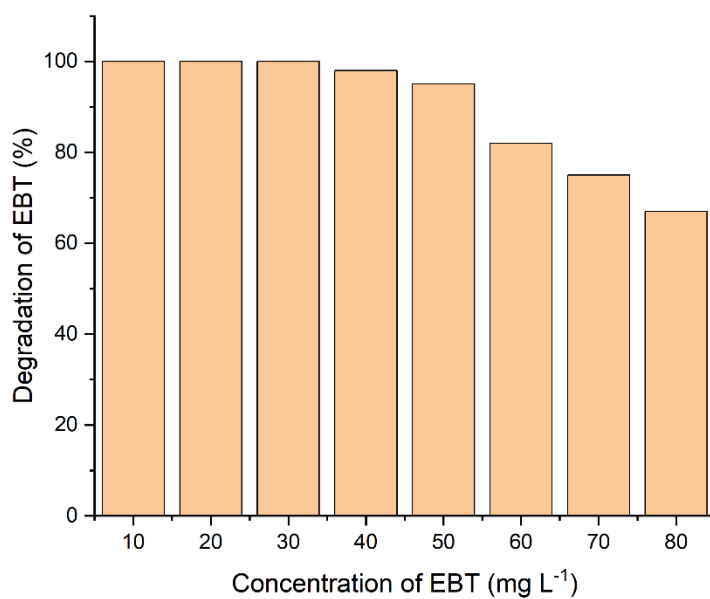

**Fig. S20** Effect of EBT dye concentration on the photodegradation by **2** (20 mg) within 90 min of visible-light irradiation.

---

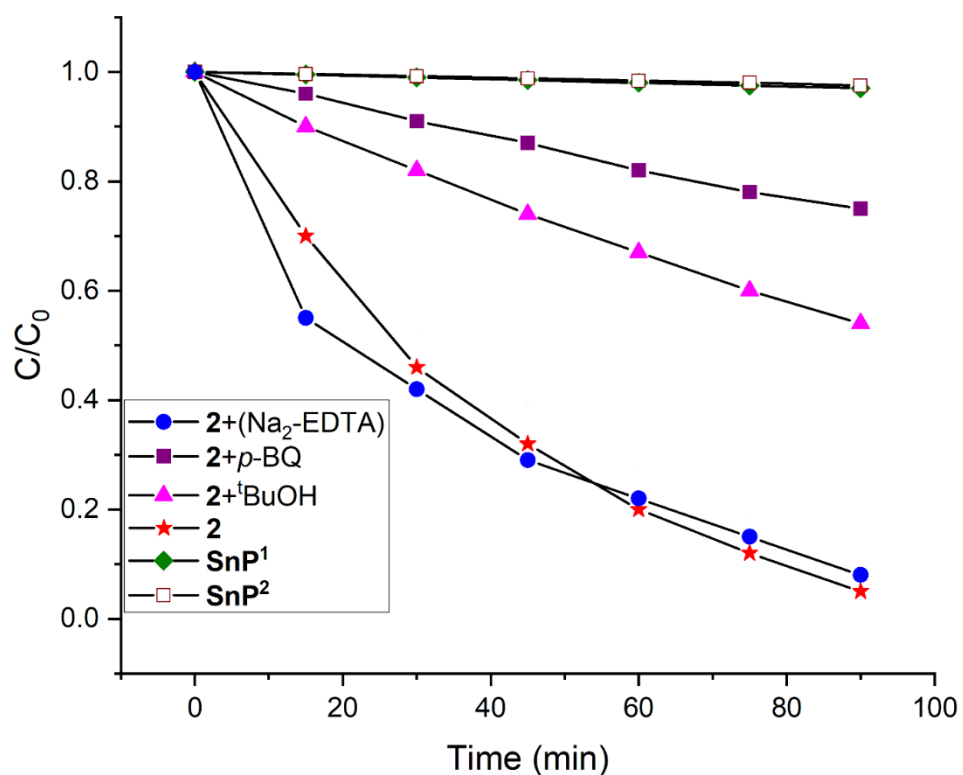

**Fig. S21** Effect of various scavengers on the degradation of EBT dye in the presence of **2** under visible-light irradiation ( $[\text{Na}_2\text{-EDTA}]_0 = [p\text{-BQ}]_0 = [t\text{BuOH}]_0 = 5\text{mM}$ ,  $\text{pH } 7.0$ ,  $T = 298\text{ K}$ ). **SnP**<sup>1</sup> and **SnP**<sup>2</sup> were used as catalysts for comparison.

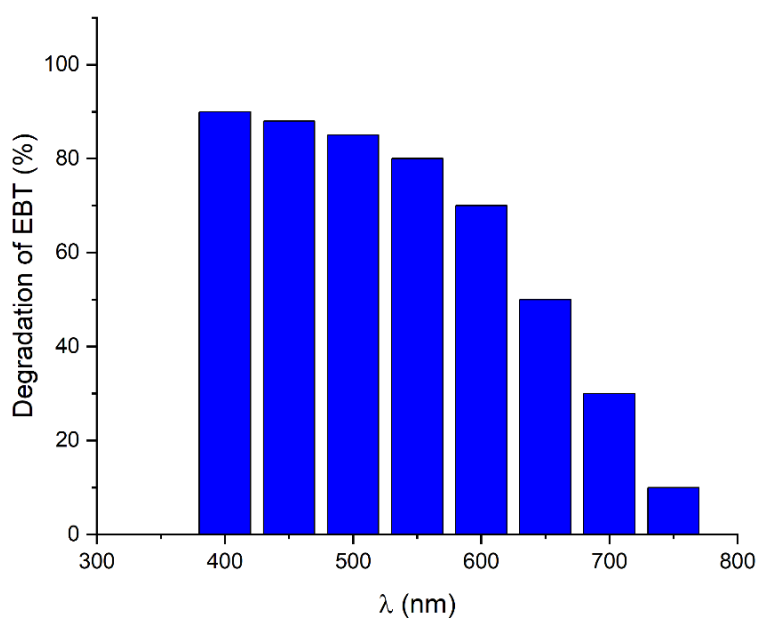

**Fig. S22** Photocatalytic activities of **2** at different wavelengths for the degradation of EBT dye.

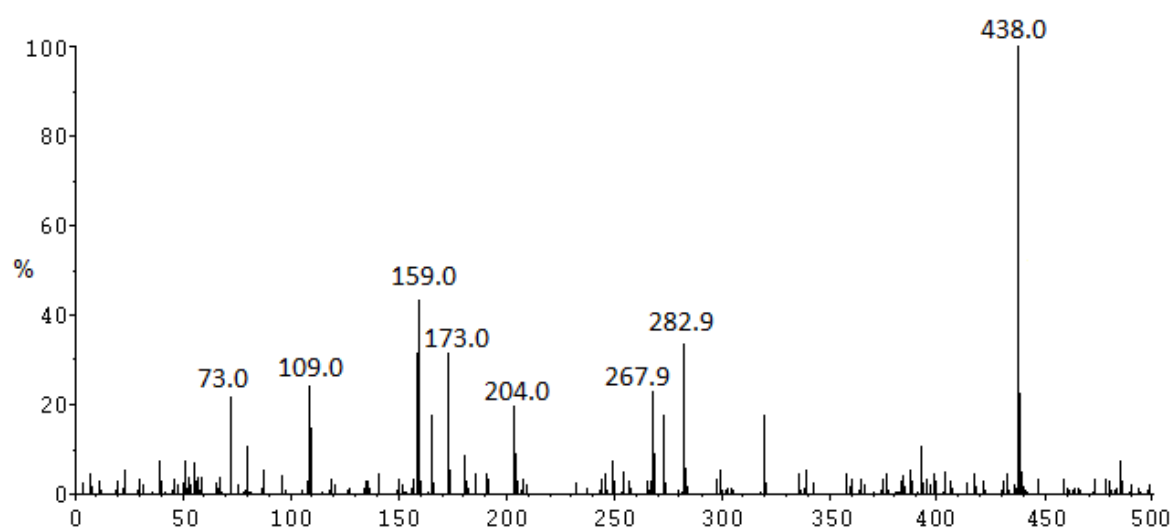

**Fig. S23** Negative ion mode ESI-MS spectrum of the reaction mixture of EBT dye in the presence of **2** after 45 min of visible-light irradiation.

---
